# Supplementary material for: Keggin-structure heteropolyacid supported on alumina to be used in trans/esterification of high-acid feedstocks
Source: Royal Society of Chemistry journal article supplement (doi:10.1039/c9ra04300d), 2019-01-01

## Keggin-structure heteropolyacid supported on alumina to be used in trans/esterification of high-acid feedstocks

Leyvison Rafael V. da Conceição<sup>1,2</sup>, Cristiano E.R. Reis<sup>1</sup>, Rosemar de Lim<sup>1</sup>, Daniela V. Cortez<sup>1</sup>,  
Heizir F. de Castro<sup>1\*</sup>

<sup>1</sup>Engineering School of Lorena-University of São Paulo, 12602-810, Lorena, São Paulo, Brazil

<sup>2</sup>Institute of Exact and Natural Sciences, Federal University of Pará, 66075-110, Belém, Brazil

### Supplemental Material

**Figure S1:** Predicted vs. observed values for (a) ester content and (b) viscosity

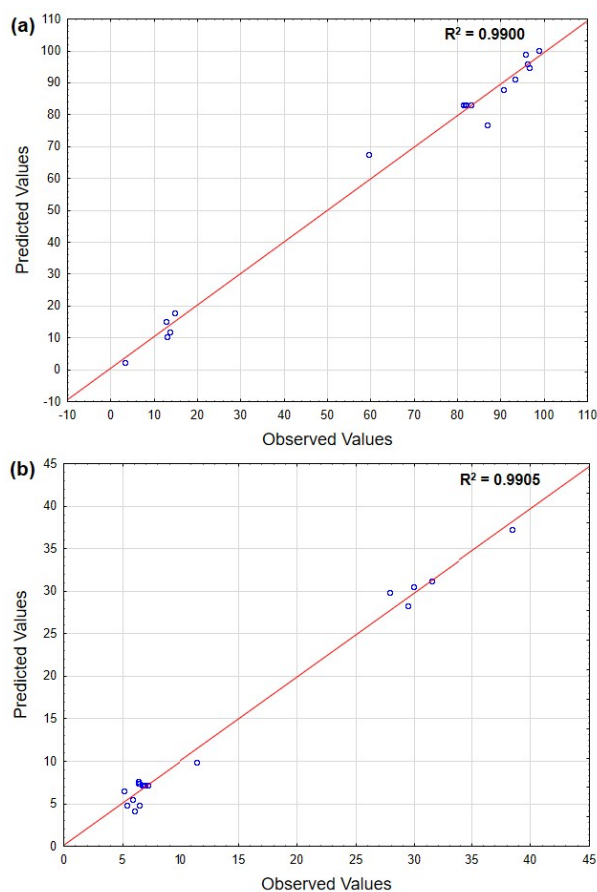

**Figure S2:** Desirability profile for optimization of the process parameters.

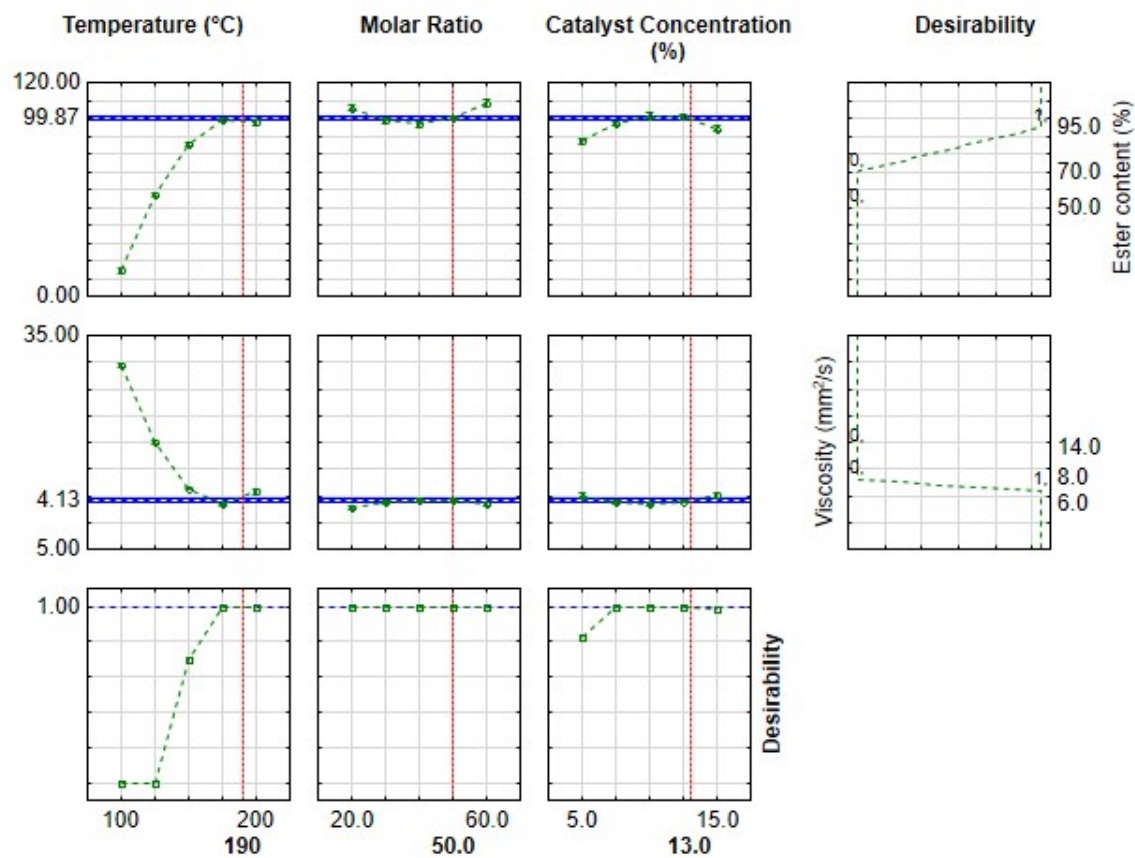

**Figure S3.** Models verification by (a) and (b) Normal probability plots of the residual, (c) and (d) Residual vs. run orders, and (e) and (f) Residual vs. predicted response.

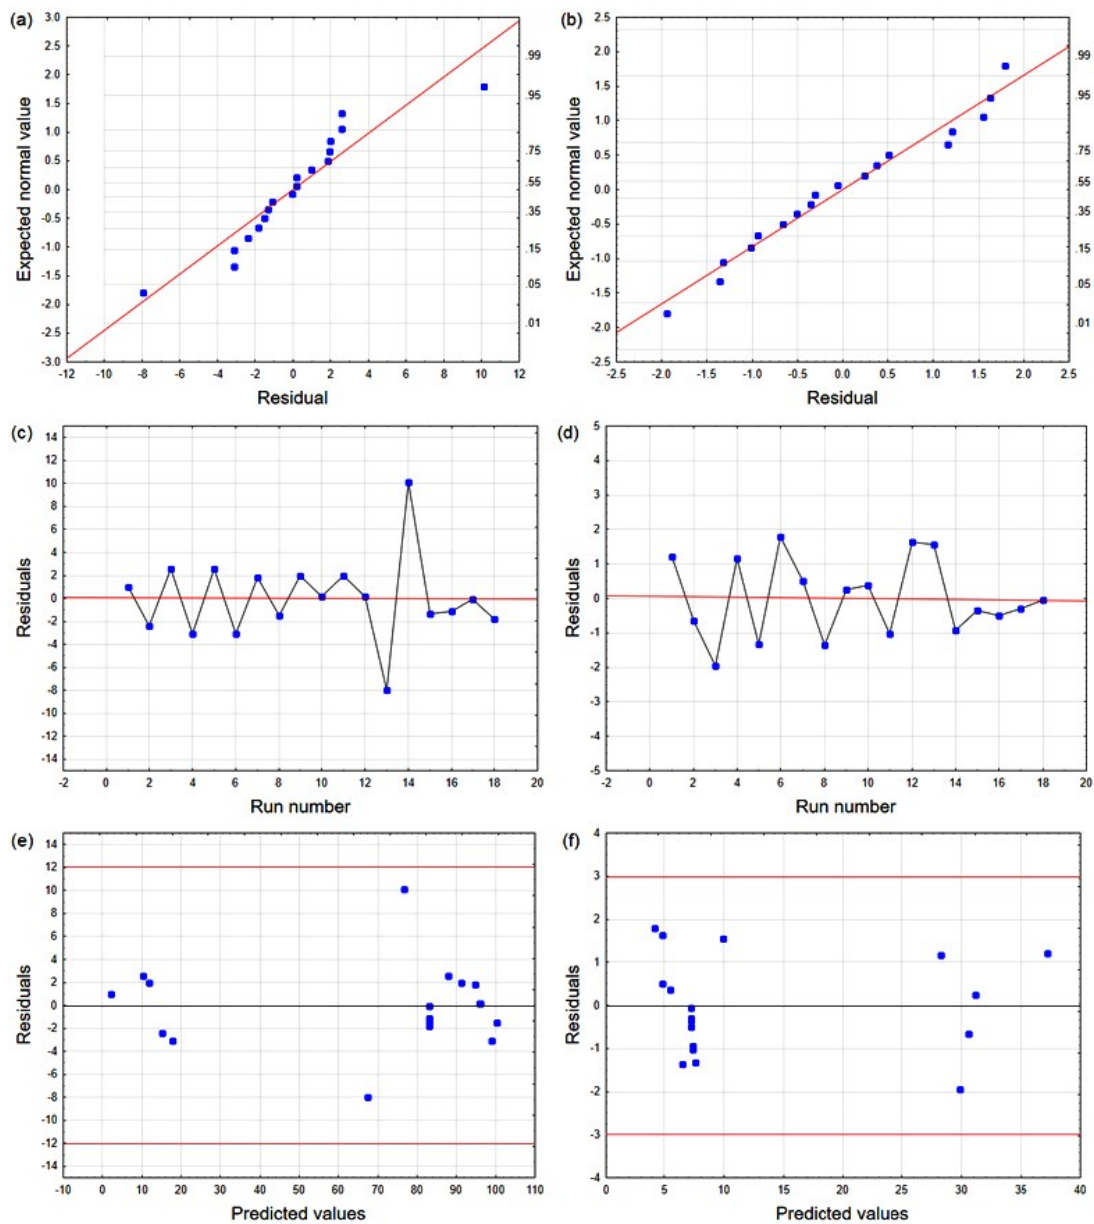

Supplement: c9ra04300d1.pdf [file c9ra04300d1.pdf]
